# Supplementary material for: Low doses of cocoa extract supplementation ameliorate diet-induced obesity and insulin resistance in rats
Source: Royal Society of Chemistry journal article supplement (doi:10.1039/c9fo00918c), 2019-01-01
Supplement: c9fo00918c1.pdf [file c9fo00918c1.pdf]

## Supplementary Methods

### 1. Chemical and Reagents for the chromatographic analysis

Standards of *p*-hydroxybenzoic acid, protocatechuic acid, *p*-coumaric acid, syringic acid, chlorogenic acid, (+)-catechin, (-)-epicatechin were purchased from Sigma-Aldrich (St Louis, MO, USA), and vanillic acid from Fluka (Buchs, Switzerland). Dimer B<sub>2</sub>, apigenin-7-*O*-glucoside, luteolin-7-*O*-glucoside, naringenin, eriodictyol, quercetin, quercetin-3-*O*-glucoside, and kaempferol-3-*O*-rutinoside were purchased from Extrasynthese (Genay, France). The standards were prepared in methanol and a stock standard solutions was dissolved in acetone/Milli-Q water/acetic acid (70/29.5/0.5, v/v/v).

Acetone and glacial acetic acid were HPLC grade and were provided by Scharlau Chemie (Barcelona, Spain). Acetonitrile (HPLC grade) was from Romyl (Teknokroma Barcelona, Spain). Water was of Milli-Q quality (Millipore Corp., Bedford, MA, USA).

### 2. Liquid chromatography (UPLC-ESI-MS/MS) conditions

The phenolic compounds were analyzed by AcQuity Ultra-Performance™ liquid chromatography (UPLC) coupled to a triple quadrupole detector (TQD) mass spectrometer (Waters, Milford). The analytical column was an AcQuity BEH C<sub>18</sub> column (100 mm × 2.1 mm i.d., 1.7 μm,) equipped with a VanGuard™ Pre-Column AcQuity BEH C<sub>18</sub> (2.1 × 5 mm, 1.7 μm), also from Waters. During the analysis, the column was kept at 30 °C and the flow rate was 0.3 mL min<sup>-1</sup>. The mobile phase was 0.2% acetic acid (eluent A), and acetonitrile (eluent B). The elution gradient was 0–5 min, 5–10% B; 5–10 min, 10–12.4% B; 10–18 min, 12.4–28% B; 18–23 min, 28–100% B; 23–25.5 min, 100% B isocratic; 25.5–27 min, 100–5% B; and 27–30 min, 5% B isocratic.

Tandem MS analyses were carried out on a triple quadrupole detector (TQD) mass spectrometer (Waters, Milford, MA, USA) equipped with a Z-spray electrospray interface (ESI). Ionization was achieved using the electrospray interface operating in the negative mode [M-H]<sup>-</sup> and the data

were acquired through selected reaction monitoring (SRM). The ionization source parameters were capillary voltage 3 kV, source temperature 150 °C and desolvation gas temperature 400 °C, with a flow-rate of 800 l/h. Nitrogen (99.99% purity, N2 LCMS nitrogen generator, Claind, Como, Italy) and argon ( $\geq 99.99\%$  purity, Aphagaz, Madrid, Spain) were used as cone and collision gases, respectively. The SRM transitions and the individual cone voltage and collision energy for each phenolic compound were evaluated by infusing 10 mg/l of each compound in order to obtain the best instrumental conditions. Two SRM transitions were selected, the most sensitive transition was used for quantification, and a second one for confirmation purposes. The SRM transition for quantification, as well as the individual cone voltage and collision energy for each phenolic compound are shown in Supplementary Table 1. The dwell time established for each transition was 30 ms. Data acquisition was carried out with the MassLynx 4.1 software.

The phenolic compounds were quantified by using own calibration curve. An exception of (epi)catechin glucoside, which was tentatively quantified by using the calibration curve of (epi)catechin; trimer and tetramer by using the calibration curve of dimer B<sub>2</sub>; procatechuic acid glucoside by using the calibration curve of procatechuic acid; apigenin-*C*-glucoside, apigenin-*C*-glucoside-(*C*-arabinoside), and apigenin-di-*C*-glucoside by using the calibration curve of apigenin-7-*O*-glucoside; naringenin glucoside by using the calibration curve of naringenin; eriodictyol glucoside by using the calibration curve of eriodictyol; quercetin arabinoside by using the calibration curve of quercetin-3-*O*-glucoside; dihydroquercetin by using the calibration curve of quercetin; and clovamide by using the calibration curve of epicatehin.

## Supplementary Tables

Supplementary Table 1. Optimized RM conditions for the quantification of the studied phenolic compounds by UPLC-MS/MS.

| Compound                                             | SRM quantification | Cone voltage (V) | Collision energy (eV) |
|------------------------------------------------------|--------------------|------------------|-----------------------|
| <i>p</i> -Hydroxybenzoic acid                        | 137 > 93           | 40               | 15                    |
| Protocatechuic acid                                  | 153 > 109          | 40               | 15                    |
| Protocatechuic acid glucoside                        | 315 > 153          | 40               | 15                    |
| <i>p</i> -Coumaric acid                              | 163 > 119          | 40               | 10                    |
| Vanillic acid                                        | 167 > 152          | 40               | 15                    |
| Syringic acid                                        | 197 > 182          | 30               | 15                    |
| Chlorogenic acid                                     | 353 > 191          | 40               | 15                    |
| Catechin                                             | 289 > 245          | 40               | 15                    |
| Epicatechin                                          | 289 > 245          | 40               | 15                    |
| Catechin glucoside                                   | 451 > 289          | 40               | 20                    |
| Epicatechin glucoside                                | 451 > 289          | 40               | 20                    |
| Epigallocatechin                                     | 305 > 125          | 40               | 15                    |
| Dimer                                                | 577 > 289          | 40               | 20                    |
| Trimer                                               | 865 > 287          | 60               | 20                    |
| Tetramer                                             | 1153 > 865         | 40               | 20                    |
| Apigenin-7- <i>O</i> -glucoside                      | 431 > 268          | 40               | 15                    |
| Apigenin- <i>C</i> -glucoside                        | 431 > 311          | 40               | 15                    |
| Apigenin- <i>C</i> -glucoside- <i>C</i> -arabinoside | 563 > 353          | 40               | 30                    |
| Apigenin-di- <i>C</i> -glucoside                     | 593 > 353          | 40               | 30                    |
| Luteolin-7- <i>O</i> -glucoside                      | 447 > 285          | 40               | 15                    |
| Naringenin                                           | 271 > 151          | 40               | 15                    |
| Naringenin glucoside                                 | 433 > 271          | 40               | 10                    |
| Eriodictyol                                          | 287 > 151          | 40               | 15                    |
| Eriodictyol glucoside                                | 449 > 287          | 40               | 15                    |
| Quercetin                                            | 301 > 151          | 40               | 15                    |
| Dihydroquercetin                                     | 303 > 285          | 40               | 10                    |
| Quercetin arabinoside                                | 433 > 300          | 40               | 20                    |
| Quercetin glucoside                                  | 463 > 300          | 40               | 25                    |
| Kaempferol rutinoside                                | 593 > 285          | 40               | 25                    |
| Clovamide                                            | 358 > 178          | 40               | 15                    |

Supplementary Table 2. Specific gene expression probes used for the quantitative real time PCR analyses.

| Gene           | Description                                              | TaqMan™ Gene Expression Assay |
|----------------|----------------------------------------------------------|-------------------------------|
| <i>Acox1</i>   | Acyl-Coenzyme A oxidase 1, palmitoyl                     | Rn01460628_m1                 |
| <i>Slc27a4</i> | Solute carrier family 27 member 4                        | Rn01438951_m1                 |
| <i>Adipoq</i>  | Adiponectin, C1Q and collagen domain containing          | Rn00595250_m1                 |
| <i>Cebpa</i>   | CCAAT/enhancer binding protein (C/EBP), alpha            | Rn00560963_s1                 |
| <i>Fasn</i>    | Fatty acid synthase                                      | Rn00569117_m1                 |
| <i>Lep</i>     | Leptin                                                   | Rn00565158_m1                 |
| <i>Pparg</i>   | Peroxisome proliferator activated receptor gamma         | Rn00440945_m1                 |
| <i>Srebf1</i>  | Sterol regulatory element binding transcription factor 1 | Rn01495769_m1                 |
| <i>Tbp</i>     | TATA box binding protein. Housekeeping gene control      | Rn01455646_m1                 |

Supplementary table 3. RQ-PCR analysis data obtained in retroperitoneal fat samples from HFS, HFS-CCL and HFS-CCH groups. Results are expressed as the fold-difference gene expression levels of each gene in the HFS-CCL and HFS-CCH groups compared with the HFS, calculated with the  $2^{-\Delta\Delta Ct}$  method.

|                | <i>Acox1</i> | <i>Slc27a4</i> | <i>Adipoq</i>            | <i>Cebpa</i>             | <i>Fasn</i>               | <i>Lep</i>  | <i>Pparg</i> | <i>Srebf1</i> |
|----------------|--------------|----------------|--------------------------|--------------------------|---------------------------|-------------|--------------|---------------|
| Anova          | ns           | ns             | 0.016                    | <0.001                   | 0.017                     | ns          | ns           | ns            |
| HFS (n=12)     | 1.00 ± 0.16  | 1.00 ± 0.64    | 1.00 ± 0.06 <sup>a</sup> | 1.00 ± 0.11 <sup>a</sup> | 1.00 ± 0.14 <sup>a</sup>  | 1.00 ± 0.11 | 1.00 ± 0.19  | 1.00 ± 0.18   |
| HFS-CCL (n=11) | 0.79 ± 0.09  | 0.91 ± 0.26    | 0.77 ± 0.04 <sup>b</sup> | 0.43 ± 0.04 <sup>b</sup> | 0.59 ± 0.06 <sup>b</sup>  | 0.89 ± 0.09 | 0.99 ± 0.13  | 0.98 ± 0.09   |
| HFS-CCH (n=12) | 0.84 ± 0.07  | 0.92 ± 0.19    | 0.70 ± 0.02 <sup>b</sup> | 0.48 ± 0.04 <sup>b</sup> | 0.70 ± 0.09 <sup>ab</sup> | 0.92 ± 0.11 | 1.03 ± 0.22  | 0.96 ± 0.08   |

<sup>a</sup> All the results are expressed as the mean ± SD.

$\Delta\Delta Ct$  values are calculated as the difference between dCt HFS – dCt HFS-CCL or CCH, for each gene.

dCt values are obtained from the difference of each gene problem with the housekeeping gene (*Tbp*, TATA box binding protein).

Statistical analyses were performed using the ANOVA test followed by Student–Newman–Keuls (SNK) test to detect differences between groups. Superscript letters a and b designate groups in which statistically significant differences were observed.

HFS, high-fat-sucrose; CCL, cocoa low dose; CCH, cocoa high dose

*Acox1*, Acyl-Coenzyme A oxidase 1, palmitoyl; *Slc27a4*, Solute carrier family 27 member 4; *Adipoq*, Adiponectin; *Cebpa*, CCAAT/enhancer binding protein, alpha; *Fasn*, Fatty acid synthase; *Lep*, Leptin; *Pparg*, Peroxisome proliferator activated receptor gamma; *Srebf1*, Sterol regulatory element binding transcription factor 1

Supplementary Table 4. Absolute and relative mean organ weights of rats after a dosing period of 60 days.

|                             | Control       | CC Low dose<br>(125 mg/kg) | CC Medium dose<br>(250 mg/kg) | CC High dose<br>(500 mg/kg) |
|-----------------------------|---------------|----------------------------|-------------------------------|-----------------------------|
| <b>Spleen</b>               |               |                            |                               |                             |
| Absolute weight (g)         | 0,618 ± 0,064 | 0,605 ± 0,050              | 0,631 ± 0,040                 | 0,608 ± 0,076               |
| Relative to body weight (%) | 0,173 ± 0,016 | 0,160 ± 0,011              | 0,176 ± 0,009                 | 0,158 ± 0,018               |
| <b>Heart</b>                |               |                            |                               |                             |
| Absolute weight (g)         | 1,050 ± 0,076 | 1,038 ± 0,110              | 1,061 ± 0,099                 | 1,122 ± 0,092               |
| Relative to body weight (%) | 0,294 ± 0,029 | 0,274 ± 0,016              | 0,294 ± 0,014                 | 0,292 ± 0,013               |
| <b>Liver</b>                |               |                            |                               |                             |
| Absolute weight (g)         | 9,958 ± 0,785 | 10,709 ± 0,928             | 9,590 ± 0,952                 | 9,987 ± 1,127               |
| Relative to body weight (%) | 2,782 ± 0,160 | 2,832 ± 0,111              | 2,658 ± 0,116                 | 2,594 ± 0,202               |
| <b>Thymus</b>               |               |                            |                               |                             |
| Absolute weight (g)         | 0,382 ± 0,041 | 0,383 ± 0,051              | 0,434 ± 0,077                 | 0,440 ± 0,063               |
| Relative to body weight (%) | 0,107 ± 0,011 | 0,101 ± 0,011              | 0,120 ± 0,016                 | 0,115 ± 0,017               |
| <b>Kidney</b>               |               |                            |                               |                             |
| Absolute weight (g)         | 1,017 ± 0,237 | 0,998 ± 0,057              | 1,008 ± 0,094                 | 0,966 ± 0,134               |
| Relative to body weight (%) | 0,267 ± 0,024 | 0,264 ± 0,012              | 0,279 ± 0,013                 | 0,251 ± 0,032               |
| <b>Adrenal</b>              |               |                            |                               |                             |
| Absolute weight (g)         | 0,055 ± 0,010 | 0,066 ± 0,020              | 0,047 ± 0,014                 | 0,060 ± 0,024               |
| Relative to body weight (%) | 0,015 ± 0,002 | 0,017 ± 0,005              | 0,013 ± 0,003                 | 0,015 ± 0,006               |
| <b>Testicle</b>             |               |                            |                               |                             |
| Absolute weight (g)         | 1,817 ± 0,115 | 1,817 ± 0,068              | 1,813 ± 0,188                 | 1,844 ± 0,067               |
| Relative to body weight (%) | 0,509 ± 0,042 | 0,482 ± 0,022              | 0,503 ± 0,029                 | 0,481 ± 0,019               |

Data are mean ± SD.

Supplementary Table 5. Clinical biochemistry of rats at day 60 after the starting dosing period.

| Day 60                           | Control      | CC Low dose<br>(125 mg/kg) | CC Medium dose<br>(250 mg/kg) | CC High dose<br>(500 mg/kg) |
|----------------------------------|--------------|----------------------------|-------------------------------|-----------------------------|
| Glucose (mg/dL)                  | 150 ± 40     | 162 ± 33                   | 142 ± 24                      | 143 ± 43                    |
| Cholesterol (mg/dL)              | 82 ± 9       | 80 ± 10                    | 91 ± 20                       | 77 ± 6                      |
| Albumin (g/dL)                   | 4,1 ± 0,2    | 4,1 ± 0,1                  | 4,2 ± 0,1                     | 4,0 ± 0,1                   |
| Urea (mg/dL)                     | 51 ± 7       | 48 ± 9                     | 47 ± 8                        | 52 ± 5                      |
| Aspartate Aminotransferase (U/L) | 76 ± 8       | 89 ± 10                    | 105 ± 43                      | 94 ± 32                     |
| Alanine Aminotransferase (U/L)   | 48 ± 9       | 43 ± 6                     | 54 ± 13                       | 58 ± 23                     |
| Total Bilirubin (mg/dL)          | 0,12 ± 0,04  | 0,11 ± 0,02                | 0,11 ± 0,01                   | 0,15 ± 0,05                 |
| Calcium (mg/dL)                  | 10,07 ± 0,17 | <b>10,35 ± 0,12 (*)</b>    | 10,25 ± 0,16                  | 9,84 ± 0,11                 |
| Creatinine (mg/dL)               | 0,48 ± 0,06  | 0,46 ± 0,06                | 0,46 ± 0,08                   | 0,48 ± 0,09                 |
| Total Protein (g/dL)             | 6,2 ± 0,3    | 6,3 ± 0,2                  | 6,3 ± 0,1                     | 6,2 ± 0,1                   |
| Sodium (mmol/L)                  | 144 ± 5      | <b>139 ± 1 (**)</b>        | 144 ± 4                       | 144 ± 5                     |
| Potassium (mmol/L)               | 4,07 ± 0,24  | 4,28 ± 0,17                | 4,12 ± 0,30                   | 4,36 ± 0,20                 |
| Clorine (mmol/L)                 | 95 ± 1       | 95 ± 1                     | 95 ± 1                        | 95 ± 1                      |

Data are mean ± SD. In bold, values that were significantly different (Mann-Whitney U Test) from the control group (\* p < 0.05, \*\* p < 0.01).

Supplementary table 6. Haematological profile of rats at day 60 after the starting dosing period.

|                                     | Control     | CC Low dose<br>(125 mg/kg) | CC Medium dose<br>(250 mg/kg) | CC High dose<br>(500 mg/kg) |
|-------------------------------------|-------------|----------------------------|-------------------------------|-----------------------------|
| RBC (x10 <sup>6</sup> cel/mL)       | 9,87 ± 0,36 | 9,08 ± 1,23                | 9,79 ± 0,49                   | 9,82 ± 0,09                 |
| WBC (x10 <sup>3</sup> cel/mL)       | 8,78 ± 1,83 | 8,52 ± 2,03                | 8,32 ± 1,01                   | 8,47 ± 1,90                 |
| Haemoglobin (g/dL)                  | 16,8 ± 1,1  | 15,9 ± 2,3                 | 17,4 ± 0,7                    | 17,0 ± 0,8                  |
| Haematocrit (%)                     | 48,5 ± 2,1  | 45,1 ± 6,1                 | 48,9 ± 1,8                    | 47,2 ± 2,0                  |
| MCV (fl)                            | 49,2 ± 0,5  | 49,6 ± 1,1                 | 50,0 ± 3,2                    | 48,1 ± 1,9                  |
| MCH (pg)                            | 17,1 ± 1,3  | 17,5 ± 0,4                 | 17,8 ± 1,0                    | 17,3 ± 0,7                  |
| MCHC (g/dL)                         | 34,7 ± 2,6  | 35,3 ± 0,5                 | 35,6 ± 0,5                    | 36,1 ± 0,2                  |
| Platelets (x10 <sup>3</sup> cel/mL) | 743 ± 296   | 695 ± 273                  | 787 ± 158                     | 722 ± 176                   |
| Eosinophils (%)                     | 2,2 ± 1,5   | 1,7 ± 0,7                  | 1,1 ± 0,2 (*)                 | 1,8 ± 0,8                   |
| Neutrophils (%)                     | 16,6 ± 1,3  | 16,0 ± 2,7                 | 18,9 ± 3,8                    | 16,2 ± 2,3                  |
| Lymphocytes (%)                     | 78,2 ± 3,3  | 78,5 ± 1,5                 | 76,7 ± 3,9                    | 78,7 ± 2,2                  |
| Monocytes (%)                       | 3,0 ± 1,4   | 3,7 ± 0,8                  | 3,3 ± 0,8                     | 3,3 ± 0,6                   |

Data are mean ± SD.

RBC, red blood cells; WBC, white blood cells; MCV, mean corpuscular volume; MCH, mean cell haemoglobin; MCHC, mean corpuscular haemoglobin concentration.

In bold, values that were significantly different (Mann-Whitney U Test) from the control group (\* p < 0.05, \*\* p < 0.01).
